# Supplementary material
Source: PubMed Central journal article supplement (PMC1719431)
Supplement: archdisch_archdischild;88_2_108__1.pdf [file archdisch_archdischild%3B88_2_108__1.pdf]

**Table 1. Background characteristics of the overall groups of mothers and infants**

|                                                                                                  | <b>Behavioural<br/>group (n=205)</b> | <b>Control<br/>group (n=405)</b> |
|--------------------------------------------------------------------------------------------------|--------------------------------------|----------------------------------|
| <b><i>Mothers</i></b>                                                                            |                                      |                                  |
| Mean (SD) age in years                                                                           | 30.2 (5.1)                           | 30.4 (4.8)                       |
| % Caucasian                                                                                      | 94                                   | 94                               |
| % Primiparae                                                                                     | 47                                   | 50                               |
| % Married                                                                                        | 81                                   | 85                               |
| % Univ./college degree                                                                           | 34                                   | 43                               |
| Usual occupation                                                                                 |                                      |                                  |
| % Professional                                                                                   | 4                                    | 6                                |
| % Managerial/technical                                                                           | 38                                   | 50                               |
| % Skilled non-manual                                                                             | 32                                   | 26                               |
| % Skilled manual                                                                                 | 7                                    | 3                                |
| % Partly skilled/unskilled                                                                       | 11                                   | 8                                |
| % Unemployed                                                                                     | 9                                    | 7                                |
| % Other children < 5                                                                             | 42                                   | 40                               |
| <b><i>Infants</i></b>                                                                            |                                      |                                  |
| Mean (SD) weeks gestational age                                                                  | 39.5 (1.3)                           | 39.7 (1.4)                       |
| Type of delivery                                                                                 |                                      |                                  |
| % Unassisted vaginal                                                                             | 65                                   | 61                               |
| % Caesarean section                                                                              | 25                                   | 24                               |
| % Forceps or vacuum assisted                                                                     | 10                                   | 16                               |
| Mean (SD) birthweight                                                                            | 3439.2 (448.6)                       | 3472.1 (460.1)                   |
| <b><i>Infant feeding method</i></b><br>(% feeding by breast only: bottle only : breast + bottle) |                                      |                                  |
| Week 1                                                                                           | 68 : 22 : 10                         | 70 : 22 : 8                      |
| Week 12                                                                                          | 30 : 25 : 45                         | 34 : 21 : 45                     |
